# Supplementary material for: Endothelial Nox5 Expression Modulates Glucose Uptake and Lipid Accumulation in Mice Fed a High-Fat Diet and 3T3-L1 Adipocytes Treated with Glucose and Palmitic Acid
Source: Int J Mol Sci. 2021 Mar 8;22(5):2729. doi: 10.3390/ijms22052729 (PMC7962974; doi:10.3390/ijms22052729)
Supplement: Supplementary file 1 [file ijms-22-02729-s001.zip]

Archive with 5 entries (5 files):
- Supplementary material_JGarcia/Figure S1.tif
- Supplementary material_JGarcia/figure S2.tif
- Supplementary material_JGarcia/Figure S3.tif
- Supplementary material_JGarcia/Supplementary material.pdf
- Supplementary material_JGarcia/table S1.tif
